# Supplementary material for: Genome-wide identification and characterization of the MADS-box gene family in Salix suchowensis
Source: PeerJ journal article supplement (doi:10.7717/peerj.8019), 2019-11-07
Supplement: Table_S1.pdf [file Table_S1.pdf]

|          | Forward primers              | Reverse primers              |
|----------|------------------------------|------------------------------|
| SsMADS9  | 5' TGCTACCGGCAAGCTCTTCG 3'   | 5' CTGCAACTCAAGAGACGGCTGA 3' |
| SsMADS11 | 5' AGCCATGGCAAGTCGCAAGA 3'   | 5' GGCGCTTGGTTCTTGTTCCG 3'   |
| SsMADS15 | 5' CCAAGAGGCGACATGGACTGT 3'  | 5' AGATGAGGAGGGCGATTTGCAC 3' |
| SsMADS37 | 5' AAACCCCAAGATTAGCAGGA 3'   | 5' CTCCGATTTCCGCATCACAC 3'   |
| SsMADS44 | 5' TGAGCCACAGACTAGATCCTT 3'  | 5' CGCTCGCTCTAGTTGCTT 3'     |
| SsMADS47 | 5' TGGCCAGTCTCAAGGGAACAGA 3' | 5' TCTTGGAGGGAAGCGCTTTGT 3'  |
| SsOTU    | 5' TGGAGCCCTGCCCTTACCAT 3'   | 5' TGTGCGCAATCTCAGGCACT 3'   |
