# Supplementary material for: Genome-wide identification and characterization of the MADS-box gene family in Salix suchowensis
Source: PeerJ journal article supplement (doi:10.7717/peerj.8019), 2019-11-07
Supplement: Table_S4.pdf [file Table_S4.pdf]

| <b>Name</b> | <b>Root</b> | <b>Stem</b> | <b>Leaf</b> | <b>Bud</b>  | <b>Bark</b> |
|-------------|-------------|-------------|-------------|-------------|-------------|
| SsMADS1     | 0.945761991 | 0           | 0.430158941 | 0           | 0.05804     |
| SsMADS2     | 0           | 1.234926703 | 0.317206554 | 0           | 0.052311    |
| SsMADS3     | 0           | 0           | 0           | 0           | 0           |
| SsMADS4     | 6.903528207 | 8.532136289 | 8.877137264 | 15.18168679 | 10.20287    |
| SsMADS5     | 1.438623874 | 0.859652349 | 0.693982415 | 2.0994325   | 2.660837    |
| SsMADS6     | 2.408836749 | 3.818364735 | 4.326522357 | 2.384516788 | 0.991837    |
| SsMADS7     | 0.051353592 | 0.260396309 | 0.520225128 | 0.665238885 | 0           |
| SsMADS8     | 4.833641405 | 0           | 0           | 0.044282468 | 0.022027    |
| SsMADS9     | 84.02437923 | 99.89303475 | 73.8354758  | 77.601881   | 109.9138    |
| SsMADS10    | 0.182211026 | 0           | 0           | 0.22479785  | 0.05591     |
| SsMADS11    | 28.98817476 | 31.73626367 | 33.29373666 | 57.4565022  | 43.35676    |
| SsMADS12    | 0           | 0           | 0           | 0           | 0           |
| SsMADS13    | 13.43770162 | 19.89097376 | 43.31325777 | 34.94650391 | 32.26951    |
| SsMADS14    | 0           | 0           | 0.133530492 | 0           | 0           |
| SsMADS15    | 9.844522544 | 33.43070759 | 49.36607104 | 54.13391929 | 16.45889    |
| SsMADS16    | 45.24110785 | 75.72679222 | 50.09771379 | 57.78895771 | 27.07595    |
| SsMADS17    | 3.265708072 | 0.238477428 | 2.901149657 | 0.139618038 | 0.104174    |
| SsMADS18    | 0           | 0           | 0           | 0           | 0           |
| SsMADS19    | 0           | 0           | 0           | 0.068444038 | 0           |
| SsMADS20    | 0           | 0           | 0           | 0           | 0           |
| SsMADS21    | 0.384333558 | 0.333488356 | 1.995775457 | 0.878592392 | 5.171552    |
| SsMADS22    | 3.163272021 | 0           | 0           | 0           | 0           |
| SsMADS23    | 0.16645411  | 0.962614139 | 1.226344036 | 1.110801108 | 0.162511    |
| SsMADS24    | 0           | 0           | 0           | 0           | 0           |
| SsMADS25    | 0.121251537 | 0.044714518 | 0           | 0           | 0           |
| SsMADS26    | 0           | 0           | 0           | 0           | 0.033393    |
| SsMADS27    | 0.244785457 | 0.041032146 | 0           | 0.048045031 | 0.501873    |
| SsMADS28    | 0.934635379 | 6.647207607 | 11.158829   | 5.332998398 | 1.971645    |
| SsMADS29    | 0.167721338 | 0           | 0.080907638 | 0           | 0           |
| SsMADS30    | 0.40123236  | 0.184955505 | 0.91245836  | 1.206585428 | 0.215451    |
| SsMADS31    | 0.063403039 | 0.701443385 | 2.339767526 | 1.009549561 | 0.170228    |
| SsMADS32    | 0           | 0           | 0           | 0.151877886 | 0           |
| SsMADS33    | 0.106564731 | 0.589475896 | 0.732536993 | 2.444544691 | 6.551955    |
| SsMADS34    | 23.88924733 | 39.91515953 | 9.023199337 | 26.54487941 | 34.98509    |
| SsMADS35    | 0.137732329 | 0.101584438 | 0           | 0           | 0           |
| SsMADS36    | 0.218252767 | 0.181093797 | 0.347436068 | 0.518331965 | 0           |
| SsMADS37    | 3.95500469  | 1.307899645 | 0.528811095 | 4.571102486 | 116.1356    |
| SsMADS38    | 0.544323448 | 0.376373999 | 0           | 0.058760109 | 0           |
| SsMADS39    | 5.201690951 | 2.205477832 | 1.449198572 | 1.351266486 | 0.985823    |
| SsMADS40    | 0.234591242 | 0.362412416 | 0.385373475 | 1.129326627 | 0.544731    |
| SsMADS41    | 12.09362126 | 30.09313119 | 32.63302245 | 23.68143761 | 16.89668    |
| SsMADS42    | 0           | 0           | 0           | 0           | 0           |
| SsMADS43    | 0           | 0           | 0.072036186 | 0.026867287 | 0           |

|          |             |             |             |             |          |
|----------|-------------|-------------|-------------|-------------|----------|
| SsMADS44 | 0           | 44.04544392 | 1.026515655 | 2.297153026 | 0.448101 |
| SsMADS45 | 13.6141018  | 0.987941363 | 7.366241094 | 3.128597541 | 16.24242 |
| SsMADS46 | 0           | 0           | 0           | 0.111885688 | 0.973955 |
| SsMADS47 | 15.10628057 | 41.44668281 | 48.26029764 | 21.73379484 | 25.295   |
| SsMADS48 | 0.077030388 | 0.047344784 | 0           | 0           | 0.110302 |
| SsMADS49 | 0.063759235 | 0           | 0           | 0           | 0.205422 |
| SsMADS50 | 0           | 0           | 0.061284517 | 0           | 0        |
| SsMADS51 | 1.307811503 | 0.183923388 | 0.320786142 | 0.215358096 | 1.380712 |
| SsMADS52 | 0.127997863 | 0.137673647 | 0           | 0.046058206 | 0        |
| SsMADS53 | 0           | 0.106333304 | 0           | 0           | 0        |
| SsMADS54 | 0           | 0.043779068 | 0           | 0           | 0.050997 |
| SsMADS55 | 0.109477272 | 0           | 0           | 0           | 0        |
| SsMADS56 | 1.938518367 | 4.354249749 | 2.932901871 | 5.650140362 | 4.882911 |
| SsMADS57 | 0           | 0           | 0           | 0           | 0        |
| SsMADS58 | 1.156600652 | 18.59383444 | 3.870683234 | 1.794803214 | 1.863188 |
| SsMADS59 | 0           | 0.044335581 | 0.208782845 | 0.207652251 | 0        |
| SsMADS60 | 0.892228294 | 2.53354145  | 5.216507227 | 0.577900132 | 0.191641 |

---
